# Supplementary material for: A Review on the Ethnomedicinal Usage, Phytochemistry, and Pharmacological Properties of Gentianeae (Gentianaceae) in Tibetan Medicine
Source: MDPI journal article supplement (doi:10.3390/plants10112383), 2021-11-05
Supplement: s1 [file s1]

# **A Review on the Ethnomedicinal Usage, Phytochemistry, and Pharmacological Properties of Gentianeae (Gentianaceae) in Tibetan Medicine**

**Xiaofeng Chi<sup>1,2</sup>, Faqi, Zhang<sup>1,2</sup>, Qingbo Gao<sup>1,2</sup>, Rui Xing<sup>1,2</sup>, Shilong Chen<sup>1,2\*</sup>**

<sup>1</sup> Northwest Institute of Plateau Biology, Chinese Academy of Sciences, Xining 810008, China

<sup>2</sup> Qinghai Provincial Key Laboratory of Crop Molecular Breeding, Xining 810008, China

\* Correspondence: [slchen@nwipb.cas.cn](mailto:slchen@nwipb.cas.cn) (S.L. Chen)

## Supplement Materials

Table S1. Formulas containing Gentianeae plants in Tibetan medicine.

| No. | Formulas (Chinese name)            | Formulas (Tibetan name)       | Containing herbs      | Attending functions                      |
|-----|------------------------------------|-------------------------------|-----------------------|------------------------------------------|
| 1   | A Zha He Ming San                  | A Zha He Ni Da Song Jiao Er   | Dida                  | Heat-clearing and detoxicating           |
| 2   | Ba Sa Mu La Long                   | Ba Sa Mu La Long              | Dida                  | Tonifying the kidney                     |
| 3   | Ba Wei Da Tang San                 | Tang Qing Jie Ba              | Dida                  | Clearing heat                            |
| 4   | Ba Wei Ding Xiang San              | Le Xi Jie Ba                  | Bangjian              | Clear and nourish throat                 |
| 5   | Ba Wei Fei Qin San                 | Xia Bu Er Jie Ba              | Dida                  | Clearing heat                            |
| 6   | Ba Wei Ling Gai San                | Mu Tuo Le Jie Ba              | Dida                  | Relieve pain                             |
| 7   | Ba Wei Tu Er Cao San               | Hong Lian Jie Ba              | Dida                  | Heat-clearing and detoxicating           |
| 8   | Ba Wei Xiao Ye Du Juan San         | Da Li Jiao Jie                | Dida                  | Stretch the muscles and smooth the vein  |
| 9   | Ba Wei Zhang Ya Cai San            | Dou Da Jie Ba                 | Dida                  | Clearing heat and benefiting gallbladder |
| 10  | Ba Zhu San                         | Zuo Wo Jie Ba                 | Dida                  | Heat-clearing and detoxicating           |
| 11  | Bang Cha He San                    | Bang Cha He                   | Bangjian              | Clearing heat and expectoration          |
| 12  | Chu Han Da Pei Wu                  | Zhang Jiao Er Qing Mao        | Jieji, Dida, Bangjian | Detoxification                           |
| 13  | Da Hei Wan                         | Ri Na He Qing Mao             | Jieji, Dida           | Detoxification                           |
| 14  | Da Hong Wan                        | Ma Er Qing Ri Bu              | Jieji, Bangjian       | Clear and nourish throat                 |
| 15  | Da Jian Tang San                   | Dui Tang Qing Mao             | Dida                  | Heal a wound                             |
| 16  | Da Tie Wan                         | Jiu He Ri Qing Mao            | Dida, Ganggaqiong     | Heat-clearing and detoxicating           |
| 17  | Da Wen Bu San                      | Mai Nian Ca Na He Qing Mao    | Dida                  | Clearing heat                            |
| 18  | Da Xiang Hong Ga Mu Xie            | Lang Qing Ga Mu Xie Ma Er Bao | Dida                  | Dispersing stagnated liver               |
| 19  | Da Yue Jing San                    | Da Xie Qing Mao               | Dida                  | Clearing heat                            |
| 20  | De Ma Er Shi San Wei Niu Huang San | De Ma Er Ge Wang Ju Song      | Dida                  | Heat-clearing and detoxicating           |
| 21  | Duo Pei San                        | Mang Jiao Er                  | Dida                  | Heat-clearing and detoxicating           |
| 22  | Duo Pei Zhang Ya Cai               | Dou Da Mang Jiao Er           | Dida                  | Heat-clearing and detoxicating           |
| 23  | Er Shi Er Wei Dan Tang San         | Chi Tang Ni Er Ni             | Dida, Bangjian        | Cholagogic                               |
| 24  | Er Shi San Wei Mao Ru San          | Sang Dang Ni Er Song          | Jieji                 | Dispelling wind and eliminating dampness |
| 25  | Er Shi Si Wei He Zi San            | A Ri Ni Er Yu                 | Dida                  | Tonifying the kidney                     |
| 26  | Er Shi Wei Mu Xiang San            | Ri Da Ni Xi                   | Ganggaqiong           | Insecticidal                             |
| 27  | Er Shi Wu Wei Bing Pian San        | Ga Bu Er Ni Er A              | Dida                  | Heat-clearing and detoxicating           |
| 28  | Er Shi Wu Wei Cao Wu San           | Man Qing Ni Er A              | Dida                  | Relieve pain                             |
| 29  | Er Shi Wu Wei Da Tang San          | Tang Qing Ni Er A             | Dida, Ganggaqiong     | Dispelling wind and eliminating dampness |
| 30  | Er Shi Wu Wei Da Xiang Hua San     | Lang Qing Mai Duo Ni Er A     | Dida                  | Detumescence                             |
| 31  | Er Shi Wu Wei Ding Xiang San       | Le Xi Ni Er A                 | Dida                  | Sedative                                 |
| 32  | Er Shi Wu Wei Duan Jie San         | Jia Le Er Ni Er A             | Ganggaqiong           | Hemostatic                               |
| 33  | Er Shi Wu Wei Han Shui Shi San     | Gui Xi Ni Er A                | Dida                  | Clearing stomach-heat                    |
| 34  | Er Shi Wu Wei Hu Fei San           | Wa Luo Ni Er A                | Dida, Bangjian        | Clearing lung-heat                       |
| 35  | Er Shi Wu Wei Jin Yao Cao San      | Ya Ji Ni Er A                 | Jieji                 | Heat-clearing and detoxicating           |
| 36  | Er Shi Wu Wei Ju Tang San          | De Le Tang Ni Er A            | Dida                  | Heat-clearing and detoxicating           |
| 37  | Er Shi Wu Wei Liu Gan Tang San     | Qia Mu Tang Ni Er A           | Dida, Ganggaqiong     | Heat-clearing and detoxicating           |
| 38  | Er Shi Wu Wei Long Dan San         | Bang Jian Ni Er A             | Bangjian, Ganggaqiong | Heat-clearing and detoxicating           |
| 39  | Er Shi Wu Wei Lü Xue San           | Wang Cha He Ni Er A           | Bangjian              | Dispelling wind and eliminating dampness |
| 40  | Er Shi Wu Wei Ma Ti San            | Da Mou Ni Er A                | Dida                  | Anti-tumour                              |
| 41  | Er Shi Wu Wei Mao Ru San           | Sang Dang Ni Er A             | Jieji                 | Dispelling wind and eliminating dampness |
| 42  | Er Shi Wu Wei Neng Ming San        | Sa Le Xie Ni Er A             | Dida                  | Treat eye disease                        |
| 43  | Er Shi Wu Wei Niu Huang Wan        | Ge Wang Ni Er A               | Jieji, Dida           | Clearing heat                            |
| 44  | Er Shi Wu Wei Qing Gang Zhi Wan    | Wai Cha He Ni Er A            | Bangjian              | Heat-clearing and detoxicating           |

|    |                                   |                              |                   |                                          |
|----|-----------------------------------|------------------------------|-------------------|------------------------------------------|
| 45 | Er Shi Wu Wei Sha Hao Wan         | Ca Er Wang Ni Er A           | Bangjian          | Clear and nourish throat                 |
| 46 | Er Shi Wu Wei Shan Hu Wan         | Xu Ma Er Ni Er A             | Dida              | Opening cardiac                          |
| 47 | Er Shi Wu Wei She Xiang San       | La Zi Ni Er A                | Dida              | Anti-anthrax                             |
| 48 | Er Shi Wu Wei Shen Ban Ji Dou San | Da He Xia Ni Er A            | Jieji, Bangjian   | Detumescence                             |
| 49 | Er Shi Wu Wei Shi Liu San         | Sai Zhi Ni Er A              | Dida              | Warm tonification                        |
| 50 | Er Shi Wu Wei Song Shi Wan        | Yu Niang Ni Er A             | Dida              | Heat-clearing and detoxicating           |
| 51 | Er Shi Wu Wei Tan Xiang San       | Zan Dan Ni Er A              | Dida, Bangjian    | Dispelling wind and eliminating dampness |
| 52 | Er Shi Wu Wei Te Rou San          | Xia Qing Ni Er A             | Dida, Ganggaqiong | Clearing heat and relieving pain         |
| 53 | Er Shi Wu Wei Tian Xian Zi San    | Lang Tang Ni Er A            | Dida              | Insecticidal                             |
| 54 | Er Shi Wu Wei Tong Hui Wan        | Sang Ta Le Ni Er A           | Dida              | Moistening lung                          |
| 55 | Er Shi Wu Wei Wu Jing Jie San     | Sao Luo Ni Er A              | Bangjian          | Clearing heat and benefiting lung        |
| 56 | Er Shi Wu Wei Xun Dao Niu San     | Mang Jian Ni Er A            | Dida              | Anti plague                              |
| 57 | Er Shi Wu Wei Yan Jing San        | Zha He Xing Ni Er A          | Dida, Jieji       | Dispersing stagnated liver               |
| 58 | Er Shi Wu Wei Yu Ling San         | Tang Se Ni Er A              | Dida              | Relieve pain                             |
| 59 | Er Shi Wu Wei Yu Zi San           | Ji Ri Ni Er A                | Dida              | Hypotensive                              |
| 60 | Er Shi Wu Wei Zhang Ya Cai San    | Dou Da Ni Er A               | Dida              | Clearing heat and benefiting gallbladder |
| 61 | Er Shi Wu Wei Zhen Ca Wan         | Zhen Ca Le Ni Er A           | Bangjian          | Dispelling wind and eliminating dampness |
| 62 | Er Shi Wu Wei Zheng Zhang Shi San | Dong Ze Ni Er A              | Dida              |                                          |
| 63 | Er Shi Wu Wei Zhu Sha San         | Ca Le Ga Er Ni Er A          | Dida              | Dispelling wind and eliminating dampness |
| 64 | Er Shi Wu Zhu San                 | Zuo Wo Ni Er A               | Dida              | Clearing heat                            |
| 65 | Er Shi Yi Wei Han Shui Shi San    | Gui Xi Ni Er Jiu             | Dida              | Clearing lung-heat                       |
| 66 | Fei Yao Bai Se Shang Yin San      | Luo Man Ga Er Bao Ya Er Zhen | Bangjian          | Reduce phlegm                            |
| 67 | Feng Shi Zhi Tong San             | Zhen Bu Sou Jiao He          | Dida              | Relieve pain                             |
| 68 | Gan Lu Liang Jing San             | Dui Zi Si Xing               | Dida              | Heat-clearing and detoxicating           |
| 69 | Gan Lu Ling San                   | Dui Zi Lai Bu Que He         | Dida              | Clearing heat and relieving pain         |
| 70 | Han Pei Han Shui Shi San          | Gui Xi Zhang Jiao Er         | Dida              | Heat-clearing and detoxicating           |
| 71 | He Zi Shuan Hou Ji                | A Ri Zhen Xie                | Jieji, Bangjian   | Clear and nourish throat                 |
| 72 | Huang Yao Pu An San               | Man Sai Er Dai Wa Ji Nian    | Dida              | Tonifying                                |
| 73 | Jiu Pei Feng Mi San               | Zhang Jiao Er Ge Wa          | Bangjian          | Clear and nourish throat                 |
| 74 | Jiu Wei A Zha He San              | A Zha He Ju Ge               | Dida              | Heat-clearing and detoxicating           |
| 75 | Jiu Wei Ding Xiang San            | Le Xi Ge Wa                  | Bangjian          | Heat-clearing and detoxicating           |
| 76 | Jiu Wei Huang Pei San             | Sai Er Bao Ge Jiao Er        | Jieji             | Anti-infectious disease                  |
| 77 | Jiu Wei Mao Ru Yao Su You         | Sang Dang Ge Wei Man Ma Er   | Jieji             | Dispelling wind and eliminating dampness |
| 78 | Jiu Wei Niu Huang San             | Ge Wang Ge Wa                | Dida              | Clearing liver-heat                      |
| 79 | Jiu Wei Tan Xiang San             | Zan Dan Ge Wa                | Dida              | Clearing kidney-heat                     |
| 80 | Jiu Wei Zhang Ya Cai San          | Dou Da Ge Wa                 | Dida              | Clearing heat and benefiting gallbladder |
| 81 | La Long Hei Yao                   | La Long Man Na He            | Dida              | Expelling parasite                       |
| 82 | Lei Feng Tu Ji                    | Zhen Bu Xiu Man              | Dida              | Dispelling wind and eliminating dampness |
| 83 | Liang Pei Han Shui Shi San        | Gui Xi Se Jiao Er            | Dida              | Detoxification                           |
| 84 | Liang Yue Hui Liu San             | Zhan Jiao Mu Da Se           | Dida              | Clearing heat                            |
| 85 | Liu Wei Bai Hua Qin Jiao San      | Ji Jie Zhou Ba               | Jieji             | Heat-clearing and detoxicating           |
| 86 | Liu Wei Da Jian Ju Tang San       | A Xia He Zhou Tang           | Jieji             | Clearing lung-heat                       |
| 87 | Liu Wei Ding Xiang San            | Le Xi Zhou Ba                | Bangjian          | Heat-clearing and detoxicating           |
| 88 | Liu Wei Long Dan Tang San         | Bang Jian Zhou Tang          | Bangjian          | Clear and nourish throat                 |
| 89 | Liu Wei Tu Er Cao Tang San        | Hong Lian Zhou Tang          | Jieji             | Clearing heat                            |
| 90 | Liu Wei Yuan Sui San              | E Si Zhou Ba                 | Jieji             | Detumescence                             |
| 91 | Liu Wei Za Mao Lan Zhong Hua      | Ao Ne Bu Zhou Tang           | Dida              | Relieve itching                          |

|     |                                       |                                  |                    |                                          |
|-----|---------------------------------------|----------------------------------|--------------------|------------------------------------------|
|     | Tang San                              |                                  |                    |                                          |
| 92  | Liu Wei Zhang Ya Cai San              | Dou Da Zhou Ba                   | Dida               | Heat-clearing and detoxicating           |
| 93  | Liu Wei Zhang Ya Cai Tang San         | Dou Da Zhou Tang                 | Dida               | Heat-clearing and detoxicating           |
| 94  | Long Dan Du Wei Tang                  | Bang Jian Qiu Tang               | Bangjian           | Cure black pox                           |
| 95  | Ma Zhen Da Tang San                   | Si Bu Tang Qing Mao              | Dida               | Antimeasle                               |
| 96  | Mi Jue Liang Pei San                  | Man E Se Jiao Er                 | Dida               | Heat-clearing and detoxicating           |
| 97  | Mi Jue Shi San Wei Hong Hua San       | Man Ge Er Ju Song                | Dida               | Clearing heat and relieving pain         |
| 98  | Mi Jue Shi Wu Wei Long Dan San        | Man E Bang Jian Jiao A           | Bangjian           | Clearing heat and benefiting lung        |
| 99  | Mu Bu Zhan Sheng San                  | Mu Bu Yu Jie                     | Dida               | Clearing stomach-heat                    |
| 100 | Neng An Jun I Ning San                | Dai Xie Ning Dan                 | Dida               | Reduce phlegm                            |
| 101 | Pu Li San                             | Pan Ba Geng Dan                  | Dida               | Insecticidal                             |
| 102 | Qi Pei Qin Pi San                     | Da Bu Sang Tun Jiao Er           | Dida               | Set a broken bone                        |
| 103 | Qi Pei Ya Zui Hua San                 | Wa Xia Ga Tun Jiao Er            | Dida               | Clearing heat                            |
| 104 | Qi Pei Zi Cao Rong San                | Jia Jie He Tun Jiao Er           | Jieji              | Detoxification                           |
| 105 | Qi Wei An Lu Zi Jin Tang San          | Dai Wa Tun Tang                  | Jieji              | Clearing heat                            |
| 106 | Qi Wei Bing Pian San                  | Ga Bu Er Tun Ba                  | Dida               | Relieve pain                             |
| 107 | Qi Wei Ci Bai San                     | Xiu Ci Er Tun Ba                 | Dida               | Tonifying the kidney                     |
| 108 | Qi Wei Da Jian Ju San                 | Han Er Jiao Mu Tun Ba            | Jieji              | Relieve pain                             |
| 109 | Qi Wei Da Tang San                    | Tang Qing Tun Ba                 | Dida               | Clearing heat                            |
| 110 | Qi Wei Ding Xiang San                 | Le Xi Tun Ba                     | Dida               | Tonifying spleen                         |
| 111 | Qi Wei Du Yi Wei San                  | Ba He Tun Ba                     | Jieji, Dida        | Clearing heat                            |
| 112 | Qi Wei Duo Sui Liao San               | Ni A Luo Tun Ba                  | Jieji              | Clearing heat                            |
| 113 | Qi Wei Gui Pi Tang San                | Xiang Ca Tun Tang                | Dida               | Cure Witbane                             |
| 114 | Qi Wei He Mao Feng Mao Ju Tang San    | Za Chi Tun Tang                  | Jieji              | Cholagogic                               |
| 115 | Qi Wei Hong Hua Shu Sheng San         | Ge Er Geng Que He Tun            | Dida               | Heat-clearing and detoxicating           |
| 116 | Qi Wei Hu Er Cao San                  | Si Mu Dou Tun Ba                 | Jieji              | Heat-clearing and detoxicating           |
| 117 | Qi Wei Huang Mao Cui Que Hua San      | Gao Le Bei Tun Ba                | Jieji              | Clearing heat                            |
| 118 | Qi Wei Jiu Hou San                    | Gao Zhai Ju Zhai Hou Tun         | Dida               | Warm tonification                        |
| 119 | Qi Wei Kuan Jin Teng Tang San         | Lie Zhe Tun Tang                 | Dida               | Heat-clearing and detoxicating           |
| 120 | Qi Wei Mao Ru Yao Su You              | Sang Dang Tun Bei Man Ma Er      | Jieji              | Clear heat and disinhibit dampness       |
| 121 | Qi Wei Mao Tang San                   | Jie Ca Tun Tang                  | Jieji              | Clear heat and disinhibit dampness       |
| 122 | Qi Wei Mi Guo Qin Tang San            | Jia Wa Tun Tang                  | Jieji              | Clear heat and disinhibit dampness       |
| 123 | Qi Wei Peng Xiao Tang San             | Ze Ca Tun Tang                   | Jieji              | Regulating menstruation                  |
| 124 | Qi Wei Qiang Wei San                  | Gao Le Tun Ba                    | Jieji              | Clear heat and disinhibit dampness       |
| 125 | Qi Wei Qin Jiao Tang San              | Ji Jie Tun Tang                  | Jieji              | Detumescence                             |
| 126 | Qi Wei San Guo Tang San               | Zhe Song Tun Tang                | Bangjian           | Clear and nourish throat                 |
| 127 | Qi Wei Sha Hao San                    | Ca Er Wang Tun Ba                | Bangjian           | Clearing heat and benefiting lung        |
| 128 | Qi Wei Tan Xiang Wan                  | Zan Dan Tun Ba                   | Jieji              | Clearing heat and benefiting lung        |
| 129 | Qi Wei Wu Nu Long Dan San             | Gang Ga Qiong Tun Ba             | Jieji, Ganggaqiong | Anti-diarrhoeal                          |
| 130 | Qi Wei Zhang Mao Feng Mao Ju Tang San | Ao Da Bu Sang Tun Tang           | Jieji              | Clearing heat                            |
| 131 | Qi Wei Zhang Ya Cai San               | Dou Da Tun Ba                    | Dida               | Heat-clearing and detoxicating           |
| 132 | Qi Zhi San                            | Yuan La He Tun Dan Ji Jiao Er Wa | Jieji, Bangjian    | Insecticidal                             |
| 133 | Ri Yue Ni Hang San                    | Ni Da Jin Duo                    | Dida               | Secure essence                           |
| 134 | San Bao San                           | Sou Qing Song Zhao Le            | Ganggaqiong        | Detoxification                           |
| 135 | San Hua Tang San                      | Mai Duo Song Tang                | Bangjian           | Anti-anthrax                             |
| 136 | San Shi Wu Si Wei He Zi San           | A Ri Sao A                       | Dida               | Tonifying kidney and diuresis            |
| 137 | San Shi Yi Wei Chen Xiang San         | A Ga Er Sao Jiu                  | Dida               | Dispelling wind and eliminating dampness |
| 138 | San Wei He Zi San                     | A Ri Song Ba                     | Dida               | Relieve pain                             |
| 139 | San Wei Leng Sha Bei Mu Tang San      | A Bu Song Tang                   | Jieji              | Dispersing stagnated liver               |

|     |                                   |                              |                 |                                                       |
|-----|-----------------------------------|------------------------------|-----------------|-------------------------------------------------------|
| 140 | San Wei Long Dan San              | Bang Jian Song Tang          | Bangjian        | Clearing heat                                         |
| 141 | San Wei Long Gu San               | Zhou Ri Song Ba              | Dida            | Relieve pain                                          |
| 142 | San Wei Qin Jiao Wan              | Ji Jie Song Ba               | Jieji, Bangjian | Clear and nourish throat                              |
| 143 | San Wei Tou Tang San              | Gao Tang Song Ba             | Dida            | Relieve pain                                          |
| 144 | San Wei Zhang Ya Cai Tang San     | Dou Hui Song Tang            | Jieji, Dida     | Clearing heat                                         |
| 145 | San Wei Zhu Huang San             | Ju Gang Song Ba              | Bangjian        | Cure esophageal disease                               |
| 146 | Sheng Yao Wang                    | Ga Le Man Jie Bao            | Bangjian        | Clear and nourish throat                              |
| 147 | Shi Ba Da Jiao                    | Jia Er Qing Jiao Jie         | Jieji           | Dispelling wind and eliminating dampness              |
| 148 | Shi Ba Wei Bing Pian San          | Ga Bu Er Jiao Jie            | Dida            | Clearing heat                                         |
| 149 | Shi Ba Wei Da Xiang San           | Lang Qing Jiao Jie           | Dida            | Warm tonification                                     |
| 150 | Shi Ba Wei He Zi Li Niao San      | Jin Ni A Ri Jiao Jie         | Dida            | Tonifying the kidney                                  |
| 151 | Shi Ba Wei He Zi San              | A Ri Jiao Jie                | Dida            | Clearing kidney-heat                                  |
| 152 | Shi Ba Wei Jin Zhi San            | Sai Er Zi Jiao Jie           | Dida            | Clearing stomach-heat                                 |
| 153 | Shi Ba Wei Qiang Wei Hua San      | Sai Mai Jiao Jie             | Dida            | Clearing heat                                         |
| 154 | Shi Ba Wei Shi Liu San            | Sai Zhi Jiao Jie             | Dida            | Improve digestion                                     |
| 155 | Shi Er Liang San                  | Sang Bao Ju Ni               | Bangjian        | Tonifying                                             |
| 156 | Shi Er Wei Qi Tang San            | Chi Tang Ju Ni               | Jieji           | Clearing heat                                         |
| 157 | Shi Er Wei Tu Er Cao San          | Hong Lian Ju Ni              | Dida            | Antiplague                                            |
| 158 | Shi Er Zhu San                    | Zuo Wo Ju Ni                 | Dida            | Clearing heat                                         |
| 159 | Shi Jiu Lei San                   | Na Mu Zhang Ju Ge            | Dida            | Tonifying spleen                                      |
| 160 | Shi Jiu Wei Cao Guo San           | Gao La Ju Ge                 | Dida            | Tonifying spleen                                      |
| 161 | Shi Jiu Wei Da Xiang San          | Lang Qing Ju Ge              | Dida            | Detumescence                                          |
| 162 | Shi Jiu Wei Shi Liu San           | Sai Zhi Ju Ge                | Dida            | Warm tonification                                     |
| 163 | Shi Lei Sheng                     | Za Mu Lang Zhou Zha          | Bangjian        | Clear and nourish throat                              |
| 164 | Shi Liu Wei Ye Niu Jiao San       | Zhong Ri A Ju Zhou           | Dida            | Anti-tumour                                           |
| 165 | Shi Liu Wei Zhang Ya Cai San      | Dou Da Ju Zhou               | Dida            | Clearing heat                                         |
| 166 | Shi Qi Wei Da Xiang Hua San       | Lang Qing Mai Duo Ju Tun     | Dida            | Anti-tumour                                           |
| 167 | Shi Qi Wei Shi Hui Yan San        | Duo Xing Ju Tun              | Jieji           | Detumescence                                          |
| 168 | Shi San Ceng San                  | Ri Mu Ba Ju Song             | Jieji, Dida     | Clearing heat                                         |
| 169 | Shi San Wei Bai Se Shang Yin Wan  | Ga Er Bao Ya Er Zhen Ju Song | Bangjian        | Clearing heat and benefiting lung                     |
| 170 | Shi San Wei Cao Tang San          | Ao Tang Ju Song              | Dida            | Detoxification                                        |
| 171 | Shi San Wei Da Xiang San          | Lang Qing Ju Song            | Dida            | Hemostatic                                            |
| 172 | Shi San Wei Hei Bai Wan           | Ga Er Na He Ju Song          | Dida            | Clearing heat                                         |
| 173 | Shi San Wei Hua Er San            | Mai Duo Ju Song              | Dida            | Heat-clearing and detoxicating                        |
| 174 | Shi San Wei Lang She San          | Jiang Jie Ju Song            | Bangjian        | Heat-clearing and detoxicating                        |
| 175 | Shi San Wei Long Dan San          | Bang Jian Ju Song            | Bangjian        | Clearing heat and benefiting lung                     |
| 176 | Shi San Wei Qian Li Guang San     | You Xiang Ju Song            | Dida            | Detoxification                                        |
| 177 | Shi San Wei Shang Yin San         | Ya Er Zhen Ju Song           | Bangjian        | Reduce phlegm                                         |
| 178 | Shi San Wei Tang Gu Te Wu Tou San | Wang Ga Er Ju Song           | Jieji, Dida     | Heat-clearing and detoxicating                        |
| 179 | Shi San Wei Xie Dan San           | Chi Gui Ju Song              | Dida            | Purgation                                             |
| 180 | Shi San Wei Ying Xiong San        | Hua Wo Ju Song               | Jieji           | Anti-measles                                          |
| 181 | Shi San Wei Zhang Ya Cai San      | Dou Da Ju Song               | Dida            | Clearing heat and benefiting gallbladder              |
| 182 | Shi San Wei Zhu Huang Wan         | Ju Gang Ju Song              | Bangjian        | Reduce phlegm                                         |
| 183 | Shi Si Ceng San                   | Ri Mu Ba Ju Yu               | Jieji           | Clearing heat                                         |
| 184 | Shi Si Wei Bing Pian San          | Ga Bu Er Ju Yu               | Dida            | Anti-influenza                                        |
| 185 | Shi Si Wei Peng Niao San          | Xia Qiong Ju Yu              | Dida            | Insecticidal                                          |
| 186 | Shi Si Wei Tang Gu Te Wu Tou San  | Wang Ga Er Ju Yu             | Jieji, Bangjian | Clearing heat                                         |
| 187 | Shi Wei Bai Hua Qin Jiao San      | Ji Jie Ju Wa                 | Jieji           | Heat-clearing and detoxicating                        |
| 188 | Shi Wei Da Tang San               | Tang Qing Ju Wa              | Dida            | Clearing heat and relieving pain                      |
| 189 | Shi Wei He Zi San                 | A Ri Ju Wa                   | Dida            | Promoting blood circulation and removing blood stasis |

|     |                                    |                               |                       |                                          |
|-----|------------------------------------|-------------------------------|-----------------------|------------------------------------------|
| 190 | Shi Wei He Zi Tang San             | A Ri Ju Wa                    | Dida                  | Clearing heat                            |
| 191 | Shi Wei Ling Gai San               | Tuo Le Ri Ju Wa               | Dida                  | Clearing heat                            |
| 192 | Shi Wei Long Dan San               | Bang Jian Ju Wa               | Bangjian              | Clearing heat and benefiting lung        |
| 193 | Shi Wei Nao Sha San                | Jia Ca Ju Wa                  | Bangjian, Ganggaqiong | Detoxification                           |
| 194 | Shi Wei Niu Huang San              | Ge Wang Ju Wa                 | Dida                  | Clearing heat                            |
| 195 | Shi Wei Zhen Ca San                | Zhen Ca Le Ju Wa              | Dida                  | Relieve pain                             |
| 196 | Shi Wu Wei Bang Cha He San         | Bang Cha He Jiao A            | Bangjian              | Clearing heat and benefiting lung        |
| 197 | Shi Wu Wei Han Shui Shi San        | Gui Xi Jiao A                 | Dida                  | Anti-tumour                              |
| 198 | Shi Wu Wei Hei Bai Wan             | Ga Er Na He Jiao A            | Dida                  | Relieve pain                             |
| 199 | Shi Wu Wei Liang Jing San          | Se Ji Le Jiao A               | Dida                  | Sedative                                 |
| 200 | Shi Wu Wei Long Dan San            | Bang Jian Jiao A              | Bangjian              | Clearing heat and benefiting lung        |
| 201 | Shi Wu Wei Shui Bai Zhi Tang San   | Ao Mu Tang Jiao A             | Ganggaqiong           | Heat-clearing and detoxicating           |
| 202 | Shi Wu Wei Zhang Ya Cai San        | Dou Da Jiao A                 | Dida, Jieji           | Clearing heat                            |
| 203 | Shi Yi Wei Da Xiang San            | Lang Qing Ju Jiu              | Dida                  | Clearing heat                            |
| 204 | Shi Yi Wei Ding Xiang San          | Le Xi Ju Jiu                  | Bangjian              | Moistening lung                          |
| 205 | Shi Yi Wei Lei Feng Tang San       | Zha He Tang Ju Jiu            | Jieji                 | Dispelling wind and eliminating dampness |
| 206 | Shi Yi Wei Nao Sha San             | Jia Ca Ju Jiu                 | Ganggaqiong, Bangjian | Detoxification                           |
| 207 | Shi Yi Wei Niu Huang Wan           | Ge Wang Ju Jiu                | Dida                  | Clearing heat                            |
| 208 | Shi Yi Wei Qing Gang San           | Wai Duo Ju Jiu                | Jieji                 | Clearing heat                            |
| 209 | Shi Yi Wei Tan Xiang San           | Zan Dan Ju Jiu                | Dida                  | Tonifying the kidney                     |
| 210 | Shi Yi Wei Tang Gu Te Wu Tou San   | Wang Ga Er Ju Jiu             | Dida                  | Detoxification                           |
| 211 | Shi Yi Wei Wu Jing Jie San         | Sao Luo Ju Jiu                | Bangjian              | Clearing heat and benefiting lung        |
| 212 | Shi Yi Wei Zhi Xie Mu Zi San       | Dou Niang Ju Jiu              | Dida                  | Clearing heat and benefiting gallbladder |
| 213 | Shi Yi Wei Zi Cao Rong San         | Jia Jie He Tun Ju Jiu         | Bangjian              | Clearing heat and benefiting lung        |
| 214 | Si Wei Hong Hua Tang San           | Ge Er Geng Yu Tang            | Dida                  | Detoxification                           |
| 215 | Si Wei Long Dan Tang San           | Bang Jian Yu Tang             | Bangjian              | Clear and nourish throat                 |
| 216 | Si Wei Mao Ru Tang San             | Sang Dang Yu Tang             | Jieji                 | Clear heat and disinhibit dampness       |
| 217 | Si Wei Pu Tao Tang San             | Geng Zhen Yu Tang             | Jieji                 | Relieve pain                             |
| 218 | Si Wei Tang Gu Te Wu Tou San       | Wang Ga Er Yu Tang            | Bangjian              | Clearing heat                            |
| 219 | Si Wei Tu Er Cao San               | Hong Lian Yu Wa               | Dida                  | Clearing heat                            |
| 220 | Si Wei Zhang Ya Cai Tang San       | Dou Hui Yu Tang               | Dida                  | Clearing heat                            |
| 221 | Wang Pei Zhi Gen San               | Dang Tun Jia Wei Jiao Er Wa   | Dida                  | Clearing heat                            |
| 222 | Wu Si Liang Yue San                | Da Se Qu Mai                  | Dida                  | Relieve pain                             |
| 223 | Wu Si Sheng                        | Qu Mai Xia He Bai Jiao Er Wa  | Dida                  | Anti-influenza                           |
| 224 | Wu Wei Bai Hua Qin Jiao San        | Ji Jie A Wa                   | Jieji                 | Heat-clearing and detoxicating           |
| 225 | Wu Wei Duan Sui Tu Er Cao Tang San | Sa Zeng A Tang                | Jieji                 | Hemostatic                               |
| 226 | Wu Wei Kuan Jin Teng Tang San      | Lie Zhe A Tang                | Dida                  | Dispelling wind and eliminating dampness |
| 227 | Wu Wei Run Jiang Tang San          | Ling Lun A Tang               | Dida                  | Clearing heat                            |
| 228 | Wu Wei Tang Gu Te Wu Tou Tang San  | Wang Ga Er A Tang             | Bangjian              | Clear and nourish throat                 |
| 229 | Wu Wei Wu Tou Tang San             | Wang A A Tang                 | Bangjian              | Clear and nourish throat                 |
| 230 | Wu Wei Zhang Ya Cai Tang San       | Dou Da A Tang                 | Dida                  | Clearing liver-heat                      |
| 231 | Wu Yun Yue Guang San               | Zhen Zha Le Da Sai Er         | Dida                  | Sedative                                 |
| 232 | Xue Ya Jun Ning San                | Cha He Xie Nian Dan           | Dida                  | Hypotensive                              |
| 233 | Yi Chu Neng An Da Jiao             | Jia Er Qing Re Ba Dai Xie     | Jieji                 | Dispelling wind and eliminating dampness |
| 234 | Ying Xiong Pu Mie San              | Zha He Bao Geng De Le         | Dida                  | Clearing heat                            |
| 235 | Yu Tuo Si Pei Cao Yao              | Yu Tuo He De Mu Yu Jiao Er Wa | Dida                  | Clearing heat                            |
| 236 | Yue Jing Gan Lu Di                 | Da Xie Shi Dui Zi Te Ba       | Dida                  | Heat-clearing and detoxicating           |
| 237 | Yue Jing Miao San                  | Da Xie Ni Ge                  | Dida                  | Heat-clearing and detoxicating           |

|     |                                     |                                |                                    |                                |
|-----|-------------------------------------|--------------------------------|------------------------------------|--------------------------------|
| 238 | Zhang Ya Cai Du Wei Tang            | Dou Da Qiu Tang                | Dida                               | Clearing heat                  |
| 239 | Zhang Ya Cai Jiu                    | Dou Da Qiang                   | Dida                               | Clearing heat                  |
| 240 | Zhen Bao Chu Han Pei                | Ren Qing Zhang Jiao Er         | Jieji, Dida, Bangjian, Ganggaqiong | Detoxification                 |
| 241 | Zhen Bao Er Shi Wu Wei Shan Hu      | Ren Qing Xu Ma Er Ni Er A      | Dida                               | Opening cardiac                |
| 242 | Zhen Bao Er Shi Wu Wei Song Shi Wan | Ren Qing Yu Niang Ni Er A      | Dida                               | Heat-clearing and detoxicating |
| 243 | Zhen Bao Sheng Pei                  | Ren Qing Xia He Bei Jiao Er Wa | Dida                               | Anti-influenza                 |

Table 3 Iridoids from Gentianeae

Table 4 Xanthonenes from Gentianeae

Table 5 Flavonoids from Gentianeae

Table 6 Triterpenoids from Gentianeae
